# Supplementary material
Source: Springer Nature journal article supplement (https://www.springermedizin.de/resource/supplementary/13756_2012_10_MOESM1_ESM.pdf/9682304)

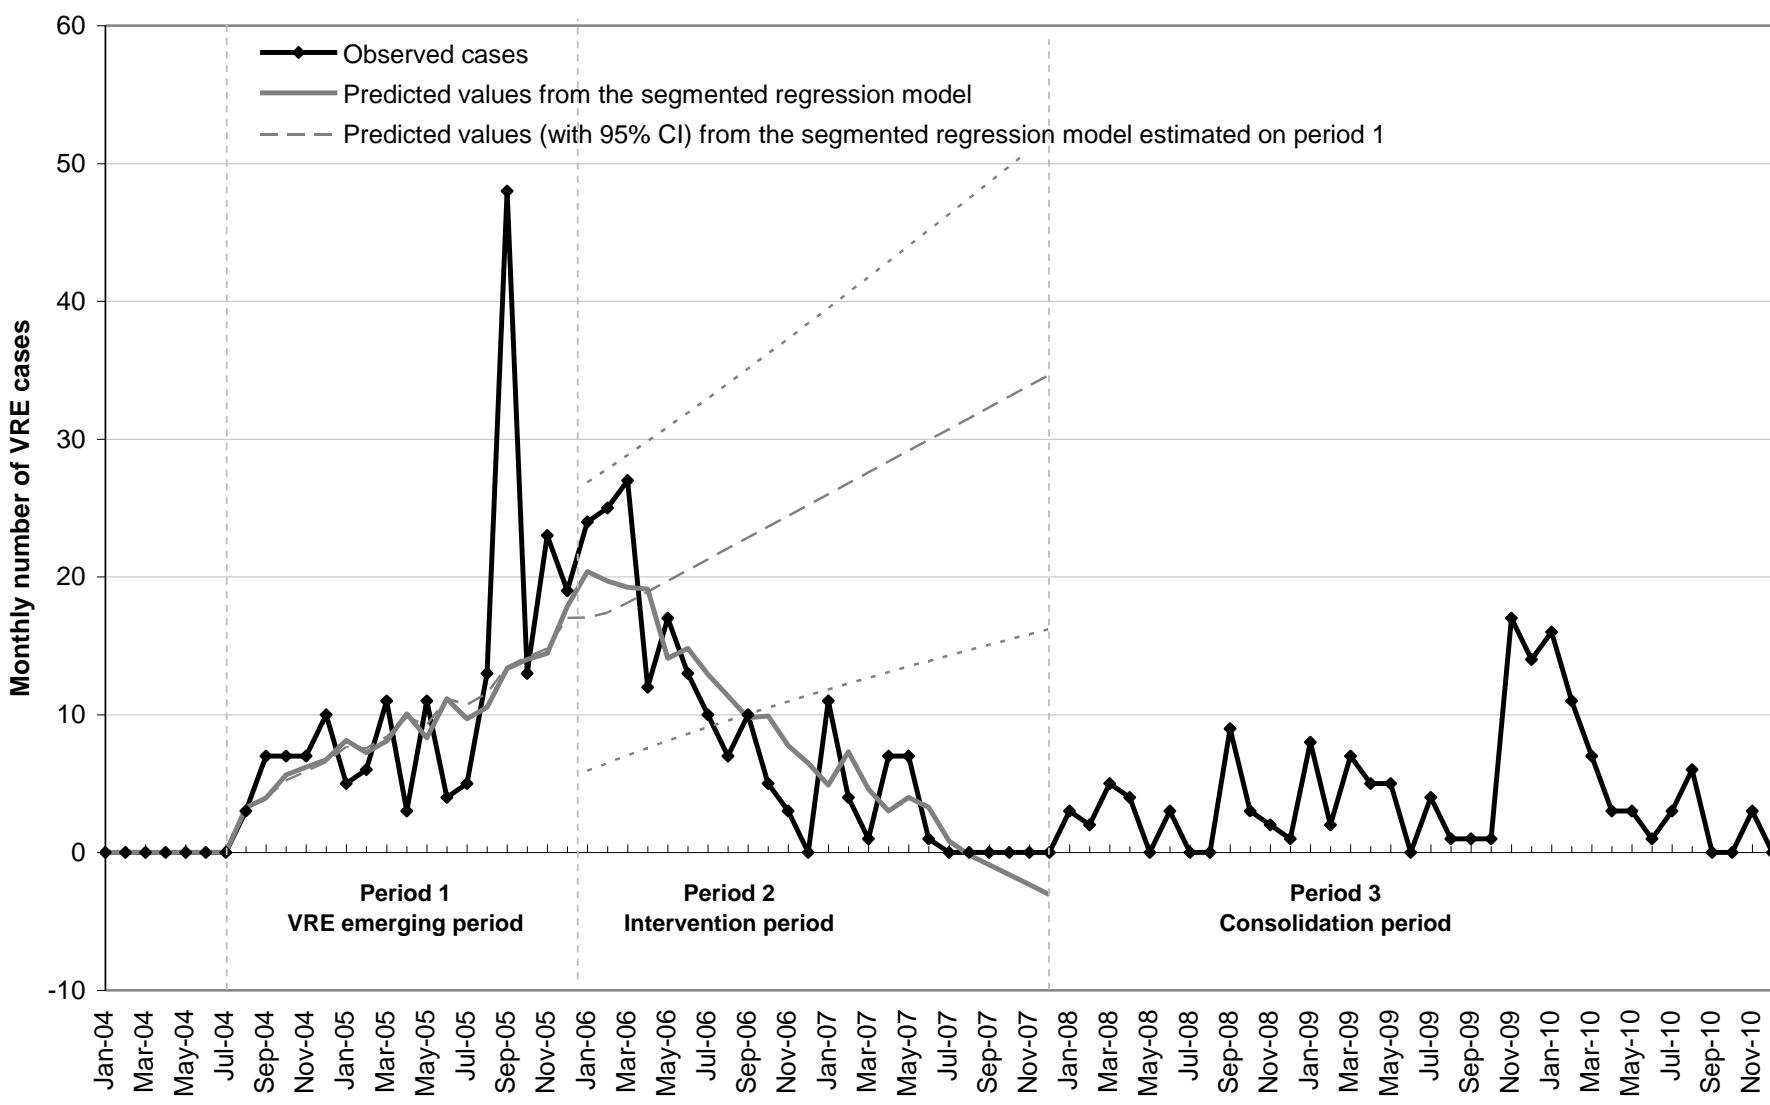

Supplement: MOESM1 [file 9682304]
